# Supplementary material for: An Insight into the Exploration of Antibiotic Resistance Genes in Calorie Restricted Diet Fed Mice
Source: MDPI journal article supplement (doi:10.3390/nu15143198), 2023-07-19
Supplement: s1 [file s1]

## **Supplementary Material**

### **An insight into the exploration of antibiotics resistance genes in calorie restricted diet fed mice**

Xiuqin Fan <sup>1</sup>, Yuanyuan Lu <sup>2</sup>, Yunfeng Zhao <sup>3</sup>, Hongjian Miao <sup>3,\*</sup>, Kemin Qi <sup>1</sup> and Rui Wang <sup>1,\*</sup>

1 Laboratory of Nutrition and Development, Key Laboratory of Major Diseases in Children, Ministry of Education, Beijing Pediatric Research Institute, Beijing Children's Hospital, Capital Medical University, National Center for Children's Health, Beijing 100045, China; qincaifan@126.com (X.F.); qikemin@bch.com.cn (K.Q.)

2 Department of Children's Health Care Center, Beijing Children's Hospital, Capital Medical University, National Center for Children's Health, Beijing 100045, China; luyuan1988220@163.com

3 NHC Key Laboratory of Food Safety Risk Assessment, Chinese Academy of Medical Sciences Research Unit (2019RU014), China National Center for Food Safety Risk Assessment, Beijing 100021, China; zhaoyf@cfsa.net.cn

\* Correspondence: miaohj@cfsa.net.cn (H.M.); 15810948239@163.com (R.W.);

Tel.: +86-10-67779768 (H.M.); +86-10-59616895 (R.W.)

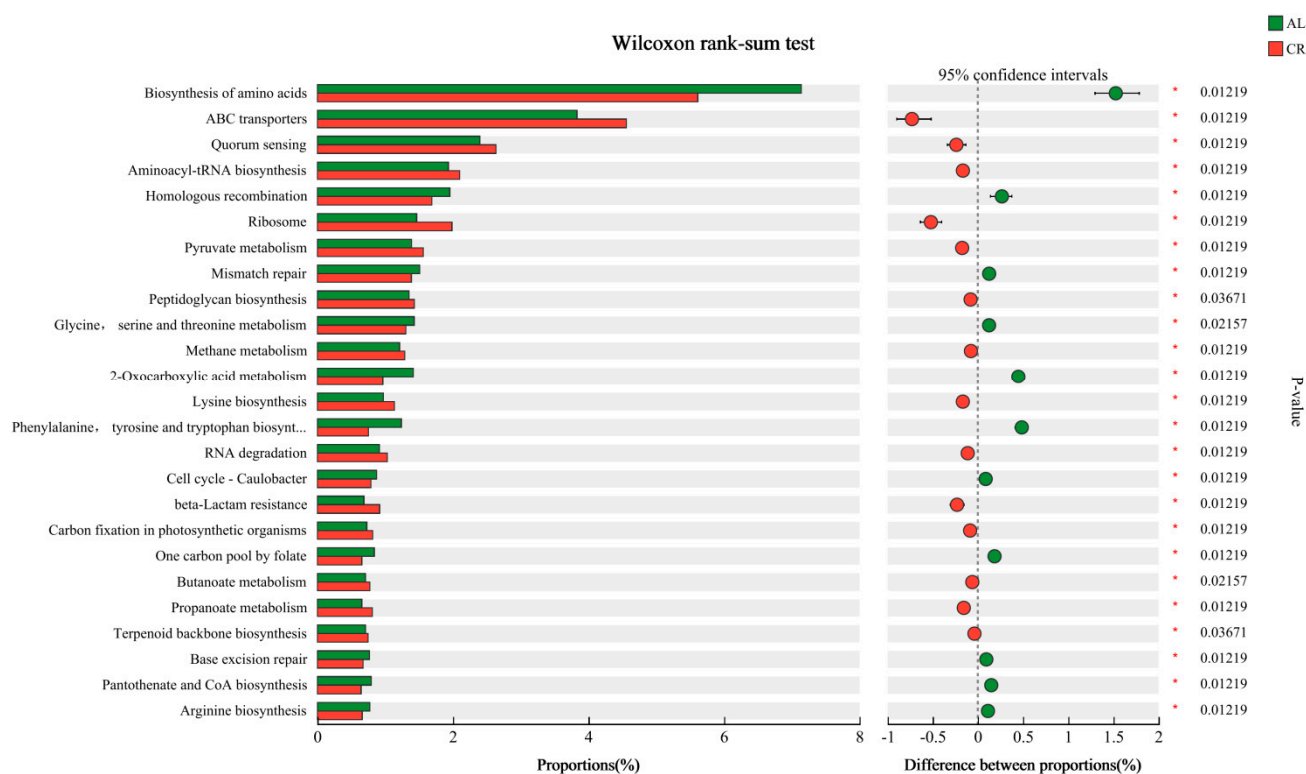

**Fig. S1** Wilcoxon rank-sum test of **functional genes** in mouse feces between AL and CR groups.

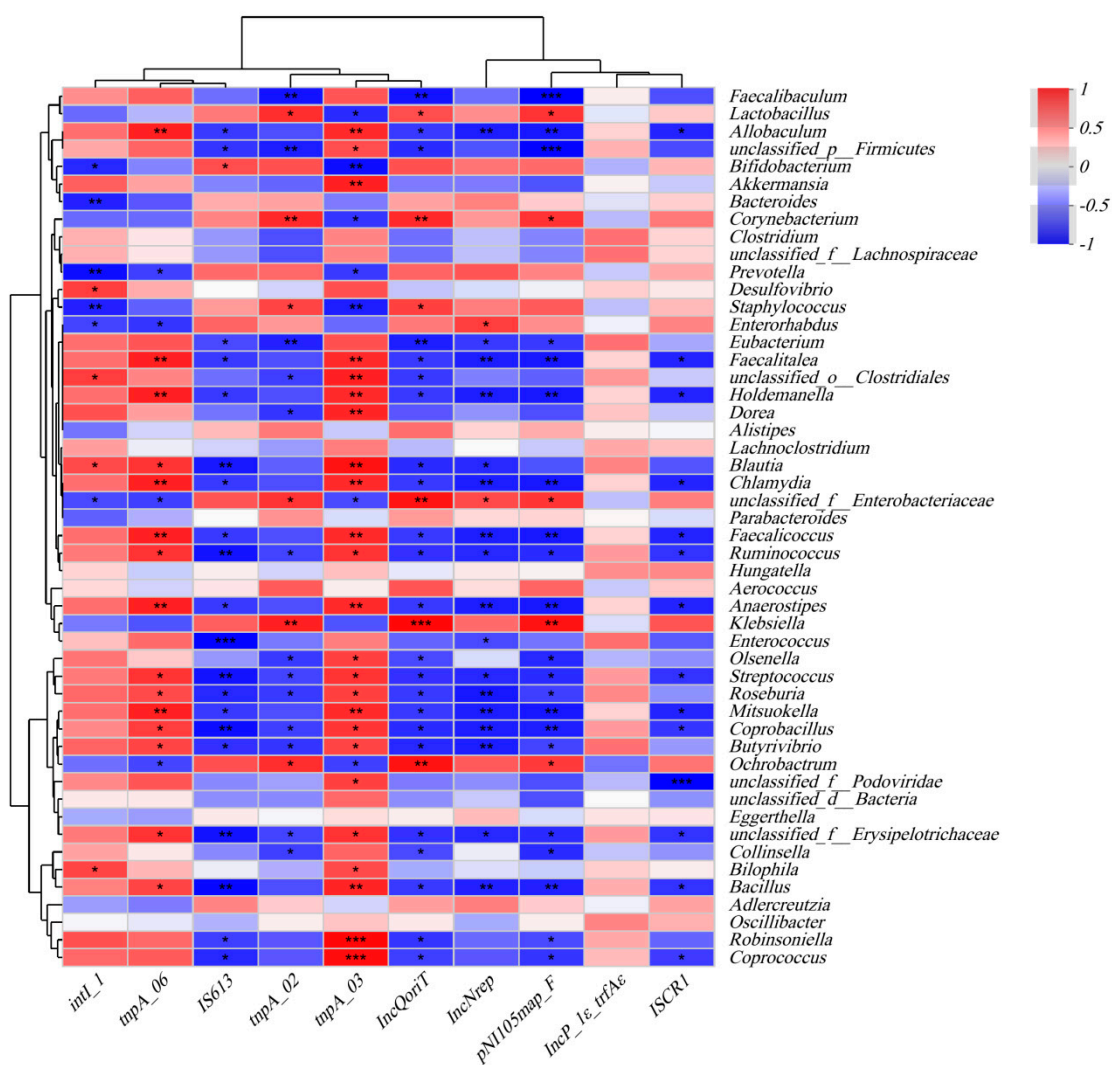

**Fig. S2** The Spearman correlations between gut microbiota and MGEs (at Genus level).

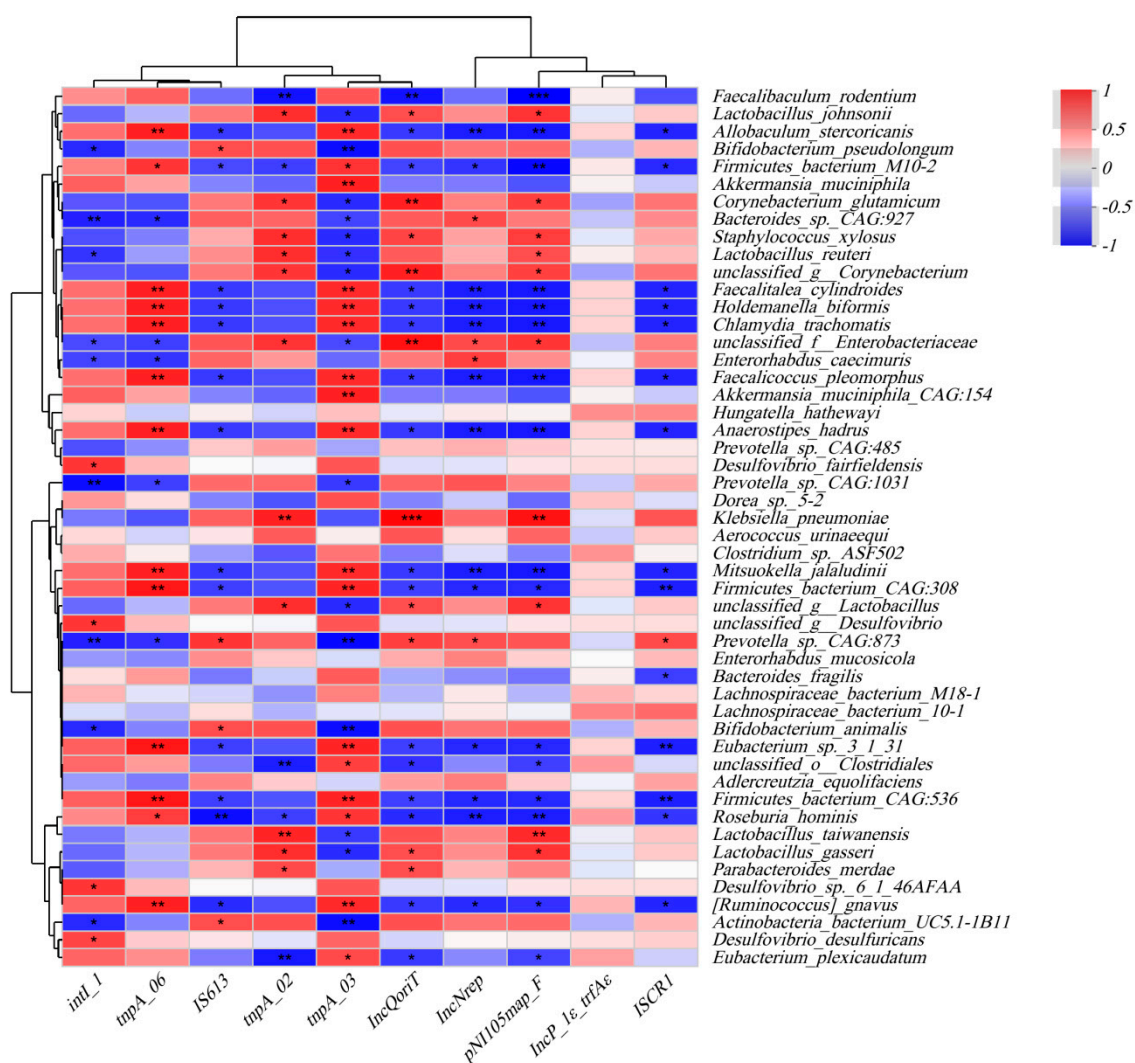

**Fig. S3** The Spearman correlations between gut microbiota and MGEs (at Species level).

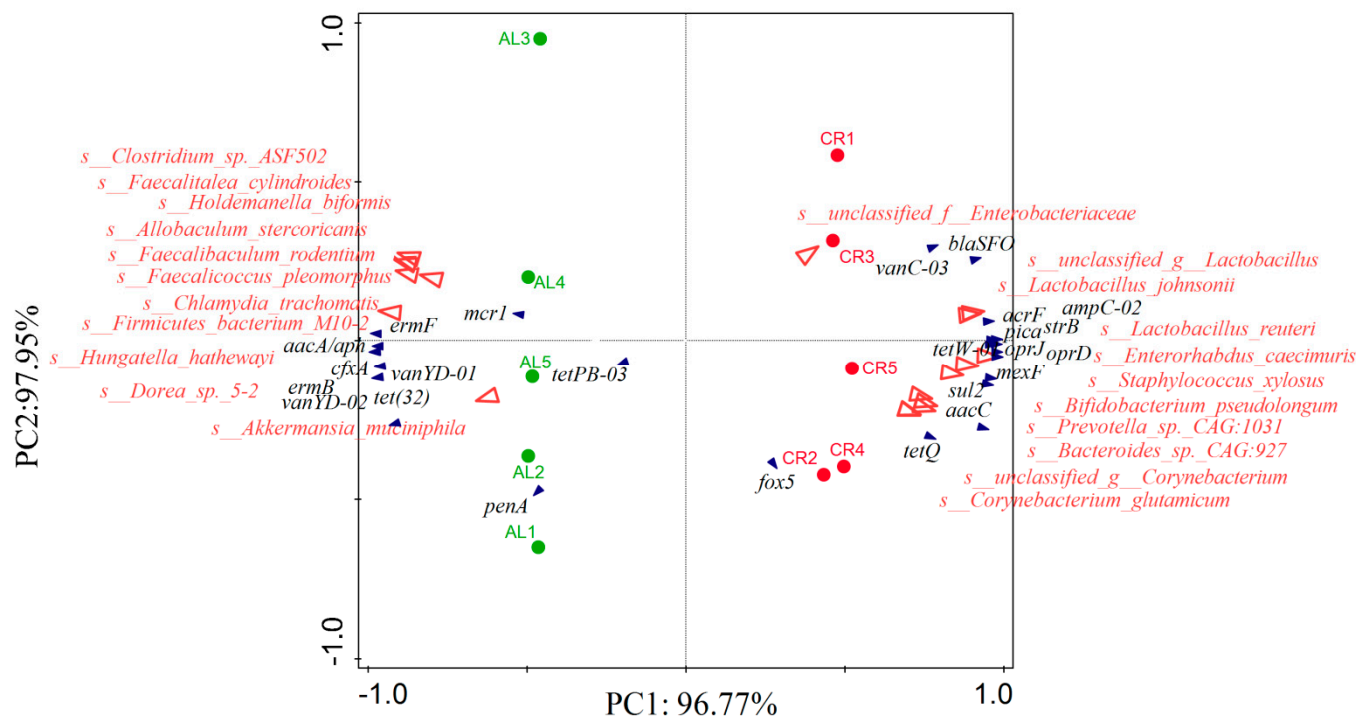

**Fig. S4** RDA analysis between ARGs and gut microbiota in mouse feces (at Speceis level).

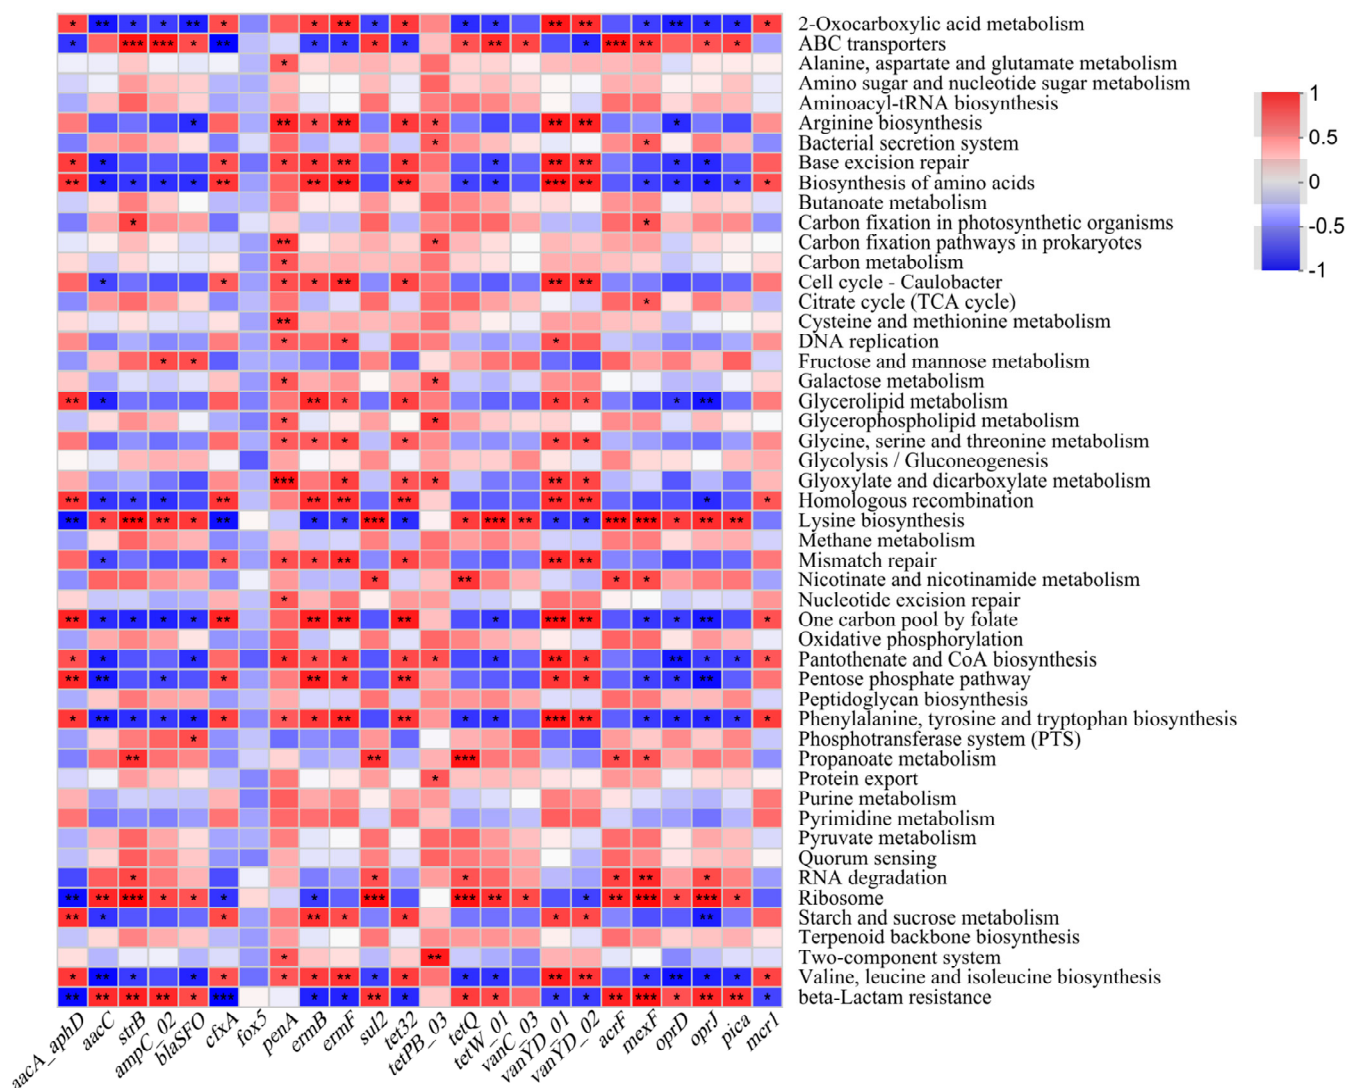

**Fig. S5** The Spearman correlations between ARGs and **abundance of functional genes** (at 3 level).

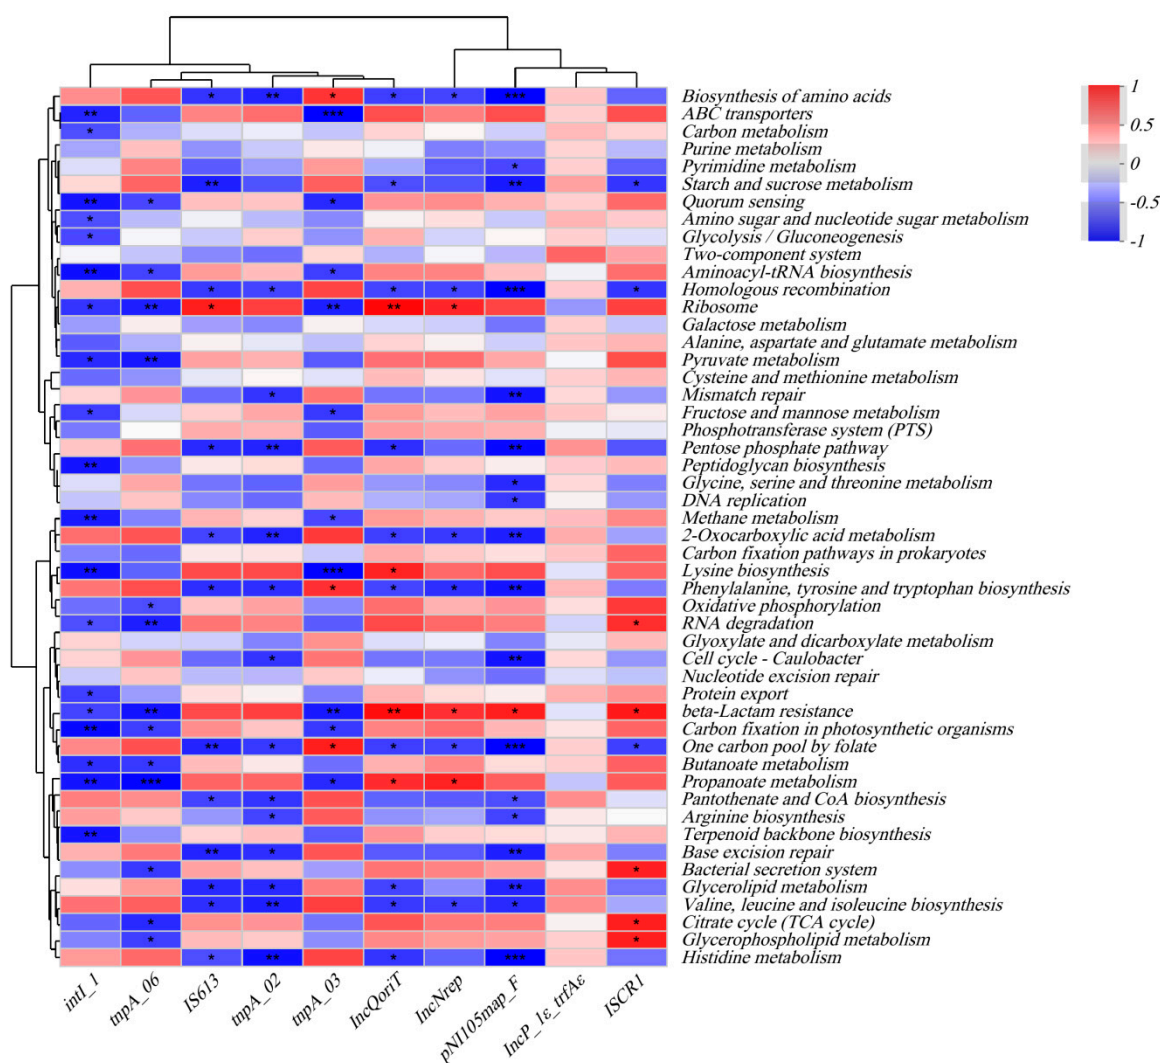

**Fig. S6** The Spearman correlations between MGEs and **abundance of functional genes** (at 3 level).

Table S1 Details of 88 pairs of primers for high-throughput quantitative PCR (HT-qPCR) [1].

| Assay Name    | Gene Name  | Mechanisms                    | Types          | Forward                      | Reverse                        |
|---------------|------------|-------------------------------|----------------|------------------------------|--------------------------------|
| 16S rRNA      | 16S rRNA   |                               |                | GGGTTCGCTCGTTGC              | ATGGYTGTCTCAGCTCGTG            |
| aac           | aac        | antibiotic inactivation       | Aminoglycoside | CCCTGCGTTGTGGCTATGT          | TTGGCCACGCCAATCC               |
| aacA/aphD     | aacA/aphD  | antibiotic inactivation       | Aminoglycoside | AGAGCCTTGGAAGATGAAGTTT       | TTGATCCATACCATAGACTATCTCATCA   |
| aacC          | aacC       | antibiotic inactivation       | Aminoglycoside | CGTCACTTATTCGATGCCCTTAC      | GTCGGGCGCGGCATA                |
| aadA-02       | aadA       | antibiotic inactivation       | Aminoglycoside | CGAGATTCTCCGCGCTGTA          | GCTGCCATTCTCCAAATTGC           |
| aphA3-02      | aphA3      | antibiotic inactivation       | Aminoglycoside | CGGAATTGAAAAAACTGATCGAA      | ATACCGGCTGTCCGTCATTT           |
| aadA2-03      | aadA2      | antibiotic inactivation       | Aminoglycoside | CAATGACATTCTTGCGGGTATC       | GACCTACCAAGGCAACGCTATG         |
| aadA5-02      | aadA5      | antibiotic inactivation       | Aminoglycoside | GTTCTTGCTCTTGCTCGCATT        | GATGCTCGGCAGGCAAAAC            |
| aadA9-01      | aadA9      | antibiotic inactivation       | Aminoglycoside | CGCGGCAAGCCTATCTTG           | CAAATCAGCGACCGCAGACT           |
| aadE          | aadE       | antibiotic inactivation       | Aminoglycoside | TACCTTATTGCCCTTGGAAGAGTTA    | GGAACATATGCCCTTTTAATTCTACAATCT |
| aph(2')-Id-01 | aph(2')-Id | antibiotic inactivation       | Aminoglycoside | TGAGCAGTATCATAAGTTGAGTGAAAAG | GACAGAACAATCAATCTCTATGGAATG    |
| strB          | strB       | antibiotic inactivation       | Aminoglycoside | GCTCGGTCTGTGAGAACAATCT       | CAATTCGGTCGCCTGGTAGT           |
| ampC-01       | ampC       | antibiotic inactivation       | Beta-Lactamase | TGGCGTATCGGGTCAATGT          | CTCCACGGGCCAGTTGAG             |
| ampC-02       | ampC       | antibiotic inactivation       | Beta-Lactamase | GCAGCACGCCCCGTAA             | TGTACCCATGATGCGCGTACT          |
| ampC-04       | ampC       | antibiotic inactivation       | Beta-Lactamase | TCCGGTGACGCGACAGA            | CAGCACGCCGGTGAAAGT             |
| blaCMY2-02    | blaCMY2    | antibiotic inactivation       | Beta-Lactamase | GCGAGCAGCCTGAAGCA            | CGGATGGGCTTGTCCTCTT            |
| blaCTX-M-04   | blaCTX-M   | antibiotic inactivation       | Beta-Lactamase | CTTGCGTGTGCGCTGAT            | CGTTCATCGGCACGGTAGA            |
| blaOXY        | blaOXY     | antibiotic inactivation       | Beta-Lactamase | CGTTCAGGCGGCAGGTT            | GCCGCGATATAAGATTTGAGAATT       |
| blaSFO        | blaSFO     | antibiotic inactivation       | Beta-Lactamase | CCGCCGCCATCCAGTA             | GGGCCGCCAAGATGCT               |
| blaSHV-01     | blaSHV     | antibiotic inactivation       | Beta-Lactamase | TCCCATGATGAGCACCTTTAAA       | TTCGTCACCGGCATCCA              |
| cfxA          | cfxA       | antibiotic inactivation       | Beta-Lactamase | TCATTCTCGTTCAAGTTTTTCA       | TGCAGACCAAGAGGAGATGT           |
| cphA-01       | cphA       | antibiotic inactivation       | Beta-Lactamase | GCGAGCTGCACAAGCTGAT          | CGGCCCAGTCGCTCTTC              |
| cphA-02       | cphA       | antibiotic inactivation       | Beta-Lactamase | GTGCTGATGGCGAGTTTCTG         | GGTGTGGTAGTTGGTGTGATCAC        |
| fox5          | fox5       | antibiotic inactivation       | Beta-Lactamase | GGTTTGCCGCTGCAGTTC           | GCGGCCAGGTGACCAA               |
| penA          | penA       | antibiotic target replacement | Beta-Lactamase | AGACGGTAACGTATAACTTTTTGAAAGA | GCGTGTAGCCGGCAATG              |
| blaNDM        | blaNDM     | antibiotic inactivation       | Beta-Lactamase | GGCCACACCAGTGACAATATCA       | CAGGCAGCCACCAAAAAGC            |
| ermB          | ermB       | antibiotic target alteration  | MLSB           | TAAAGGGCATTAAACGACGAAACT     | TTTATACCTCTGTTTGTAGGGAATTGAA   |
| ermF          | ermF       | antibiotic target alteration  | MLSB           | CAGCTTTGGTTGAACATTTACGAA     | AAATTCCTAAAAATCACAACCGACAA     |
| lnuA-01       | lnuA       | antibiotic inactivation       | MLSB           | TGACGCTCAACACACTCAAAAA       | TTCATGCTTAAGTTCCATACGTGAA      |



|             |             |                              |              |                                                                |                                                               |
|-------------|-------------|------------------------------|--------------|----------------------------------------------------------------|---------------------------------------------------------------|
| lnuC        | lnuC        | antibiotic inactivation      | MLSB         | TGGTCAATATAACAGATGTAAACCAGATTT                                 | CACCCCAGCCACCATCAA                                            |
| matA/mel    | matA/mel    | antibiotic efflux            | MLSB         | TAGTAGGCAAGCTCGGTGTTGA                                         | CCTGTGCTATTTTAAGCCTTGTTTCT                                    |
| mefA        | mefA        | antibiotic efflux            | MLSB         | CCGTAGCATTGGAACAGCTTTT                                         | AAACGGAGTATAAGAGTGCTGCAA                                      |
| mphA-01     | mphA        | antibiotic inactivation      | MLSB         | CTGACGCGCTCCGTGTT                                              | GGTGGTGCATGGCGATCT                                            |
| oleC        | oleC        | antibiotic efflux            | MLSB         | CCCGGAGTCGATGTTCTGA                                            | GCCGAAGACGTACACGAACAG                                         |
| vgaB-01     | vgaB        | antibiotic target protection | MLSB         | TAAAAGAGAATAAGGCGCAAGGA                                        | TGTTTAGTAGCATGTTGCATTTTCC                                     |
| vgb-01      | vgb         | antibiotic inactivation      | MLSB         | AGGGAGGGTATCCATGCAGAT                                          | ACCAAATGCGCCCGTTT                                             |
| tet(32)     | tet(32)     | antibiotic target protection | Tetracycline | CCATTACTTCGGACAACGGTAGA                                        | CAATCTCTGTGAGGGCATTTAACA                                      |
| tet(34)     | tet(34)     | antibiotic inactivation      | Tetracycline | CTTAGCGCAAACAGCAATCAGT                                         | CGGTGATACAGCGCGTAAACT                                         |
| tetA-02     | tetA        | antibiotic efflux            | Tetracycline | CTCACCAGCCTGACCTCGAT                                           | CACGTTGTTATAGAAGCCGCATAG                                      |
| tetG-01     | tetG        | antibiotic efflux            | Tetracycline | TCAACCATTGCCGATTCTGA                                           | TGGCCCGCAATCATG                                               |
| tetG-02     | tetG        | antibiotic efflux            | Tetracycline | CATCAGCGCCGGTCTTATG                                            | CCCCATGTAGCCGAACCA                                            |
| tetM-01     | tetM        | antibiotic target protection | Tetracycline | CATCATAGACACGCCAGGACATAT                                       | CGCCATCTTTTCAGAAATCA                                          |
| tetM-02     | tetM        | antibiotic target protection | Tetracycline | TAATATTGGAGTTTTAGCTCATGTTGATG<br>AGTTGCAGATGTGTATAGTCGTAACTATC | CCTCTCTGACGTTCTAAAAGCGTATTAT                                  |
| tetPA       | tetPA       | antibiotic efflux            | Tetracycline | TATT                                                           | TGCTACAAGTACGAAAACAAAAGTAGAA<br>TGACCCTACTGAAACATTAGAAATATACC |
| tetPB-03    | tetPB       | antibiotic target protection | Tetracycline | TGGGCGACAGTAGGCTTAGAA                                          | T                                                             |
| tetQ        | tetQ        | antibiotic target protection | Tetracycline | CGCCTCAGAAGTAAGTTCATACACTAAG                                   | TCGTTTCATGCGGATATTATCAGAAT                                    |
| tetS        | tetS        | antibiotic target protection | Tetracycline | TTAAGGACAAACTTTCTGACGACATC                                     | TGTCTCCCATTTGTTCTGGTTCA                                       |
| tetW-01     | tetW        | antibiotic target protection | Tetracycline | ATGAACATTCCCACCGTTATCTTT                                       | ATATCGGCGGAGAGCTTATCC                                         |
| vanB-01     | vanB        | antibiotic target alteration | Vancomycin   | TTGTGCGCGAAGTGATCA                                             | AGCCTTTTCCGGCTCGTT                                            |
| vanC-03     | vanC        | antibiotic target alteration | Vancomycin   | AAATCAATACTATGCCGGGCTTT                                        | CCGACCGTGCCATCA                                               |
| vanC2/vanC3 | vanC2/vanC3 | antibiotic target alteration | Vancomycin   | TTTGA CTGTCGGTGCTTGTGA                                         | TCAATCGTTTCAGGCAATGG                                          |
| vanHB       | vanHB       | antibiotic target alteration | Vancomycin   | GAGGTTTCCGAGGCGACAA                                            | CTCTCGGCGGCAGTCGTAT                                           |
| vanTC-02    | vanTC       | antibiotic target alteration | Vancomycin   | ACAGTTGCCGCTGGTGAAG                                            | CGTGGCTGGTCGATCAAAA                                           |
| vanYD-01    | vanYD       | antibiotic target alteration | Vancomycin   | AAGGCGATACCCTGACTGTCA                                          | ATTGCCGACGGAAGCA                                              |
| vanYD-02    | vanYD       | antibiotic target alteration | Vancomycin   | CAAACGGAAGAGAGGTCACTTACA                                       | CGGACGGTAATAGGGACTGTTC                                        |
| acrA-03     | acrA        | antibiotic efflux            | Multidrug    | CAGACCCGCATCGCATATT                                            | CGACAATTTGCGGCTCATG                                           |
| acrA-04     | acrA        | antibiotic efflux            | Multidrug    | TACTTTGCGCGCCATCTTC                                            | CGTGCGGAACGAACAT                                              |
| acrA-05     | acrA        | antibiotic efflux            | Multidrug    | CGTGCGGAACGAACA                                                | ACTTTGCGGCCATCTTC                                             |

|               |             |                               |               |                           |                            |
|---------------|-------------|-------------------------------|---------------|---------------------------|----------------------------|
| acrF          | acrF        | antibiotic efflux             | Multidrug     | GCGGCCAGGCACAAAA          | TACGCTCTTCCACGGTTTC        |
| ceoA          | ceoA        | antibiotic efflux             | Multidrug     | ATCAACACGGACCAGGACAAG     | GGAAAGTCCGCTCACGATGA       |
| emrD          | emrD        | antibiotic efflux             | Multidrug     | CTCAGCAGTATGGTGGTAAGCATT  | ACCAGGCGCCGAAGAAC          |
| floR          | floR        | antibiotic efflux             | Multidrug     | ATTGTCTTCACGGTGTCCGTTA    | CCGCGATGTCGTCGAAC          |
| mepA          | mepA        | antibiotic efflux             | Multidrug     | ATCGGTCGCTCTTCGTTTAC      | ATAAATAGGATCGAGCTGCTGGAT   |
| mexF          | mexF        | antibiotic efflux             | Multidrug     | CCGCGAGAAGGCCAAGA         | TTGAGTTCGGCGGTGATGA        |
| mtrD-03       | mtrD        | antibiotic efflux             | Multidrug     | CCGCCAAGCCGATATAGACA      | GGCCGGGTTGCCAAA            |
| oprD          | oprD        | antibiotic efflux             | Multidrug     | ATGAAGTGGAGCGCCATTG       | GGCCACGGCGAACTGA           |
| oprJ          | oprJ        | antibiotic efflux             | Multidrug     | ACGAGAGTGGCGTGCACAA       | AAGGCGATCTCGTTGAGGAA       |
| qacEdelta1-02 | qacEA1      | antibiotic efflux             | Multidrug     | CCCCCTCCGCCGTTGT          | CGACCAGACTGCATAAGCAACA     |
| ttgB          | ttgB        | antibiotic efflux             | Multidrug     | TCGCCCTGGATGTACACCTT      | ACCATTGCCGACATCAACAAC      |
| yceL/mdtH-01  | yceL/mdtH   | antibiotic efflux             | Multidrug     | TCGGGATGGTGGGCAAT         | CGATAACCGAGCCGATGTAGA      |
| intl-1        | intl-1      | MGEs/integrase                | MGEs          | CGAACGAGTGGCGGAGGGTG      | TACCCGAGAGCTTGGCACCCA      |
| tnpA-06       | tnpA        | MGEs/Transposase- IS6         | MGEs          | TGCAGATGGTTTAACCTTGATATTT | TCGGTTCATCAAACCTGCTTCAC    |
| IS613         | IS613       | MGEs/Transposase- IS613       | MGEs          | AGGTTCGGACTCAATGCAACA     | TTCAGCACATACCGCCTTGAT      |
|               |             | MGEs/Transposase- IS4         |               |                           |                            |
| tnpA-02       | tnpA        | Group                         | MGEs          | GGGCGGGTCGATTGAAA         | GTGGGCGGGATCTGCTT          |
|               |             | MGEs/Transposase- IS6         |               |                           |                            |
| tnpA-03       | tnpA        | Group                         | MGEs          | AATTGATGCGACGGCTTAA       | TCACCAAACCTGTTTATGGAGTCGTT |
| IncQoriT      | IncQoriT    | MGEs/plasmids                 | MGEs          | TTCGCGCTCGTTGTTCTTCGAGC   | GCCGTTAGGCCAGTTTCTCG       |
| IncNrep       | IncNrep     | MGEs/plasmids                 | MGEs          | AGTTCACCACCTACTCGCTCCG    | CAAGTTCCTCTGTTGGGATTCCG    |
| pNI105map-F   | pNI105map-F | MGEs/plasmids                 | MGEs          | CCCCAGGACTTGCGAGCG        | GAGGCATGCACGCCGACCA        |
| IncP-1ε-trfAε | IncP-1ε     | MGEs/plasmids                 | MGEs          | ACGAAGAAATGGTTGTCCTGTTC   | CGTCAGCTTGCGGTACTTCTC      |
| ISCR1         | ISCR1       | MGEs                          | MGEs          | ATGGTTTCATGCGGGTT         | CTGAGGGTGTGAGCGAG          |
| sul2          | sul2        | antibiotic target replacement | Sulfonamide   | TCATCTGCCAAACTCGTCGTTA    | GTCAAAGAACGCCCAATGT        |
| nisB          | nisB        | unknown                       | Others        | GGGAGAGTTGCCGATGTTGTA     | AGCCACTCGTTAAAGGGCAAT      |
| pica          | pica        | other/unknown                 | Others        | GCAATCGAGGCGGTGTTC        | TTGCCGAGCCAATTCA           |
| sat4          | sat4        | antibiotic inactivation       | Others        | GAATGGGCAAAGCATAAAAACTTG  | CCGATTTTGAAACCACAATTATGATA |
| mcr1          | mcr1        | antibiotic target alteration  | Others        | CACATCGACGGCGTATTCTG      | CAACGAGCATACCGACATCG       |
| 22S rDNA      | 22S rDNA    | pathogens/Enterococci         | Enterococci   | AGAAATTCCAAACGAACCTTG     | CAGTGCTCTACCTCCATCATT      |
| ecfX          | ecfX        | pathogens/P. aeruginosa       | P. aeruginosa | AGCGTTCGTCTGCACAAGT       | TCCACCATGCTCAGGGAGAT       |

uidA

uidA

pathogens/E. coli

E. coli

AACCACGCGTCTGTTGACTG

CCCGGTTGCCAGAGGTG

---

[1] Wang R, Chen D, Wang F, Fan X, Fan C, Tang T, et al. An insight into the exploration of proliferation of antibiotic resistance genes in high-fat diet induced obesity mice. *Genomics*. 2021;113:2503-12.
